# Supplementary material for: Dehydroabietylamine-decorated imino-phenols: supramolecular gelation and gel phase selective detection of Fe3+, Cu2+ and Hg2+ ions under different experimental conditions
Source: Royal Society of Chemistry journal article supplement (doi:10.1039/d2nj00830k), 2022-01-01
Supplement: d2nj00830k1.pdf [file d2nj00830k1.pdf]

## Supporting Information

### Dehydroabietylamine-decorated imino-phenols: Supramolecular gelation and gel phase selective detection of Fe<sup>3+</sup>, Cu<sup>2+</sup> and Hg<sup>2+</sup> ions under different experimental conditions

Subhasis Ghosh, Sumit Ghosh, Nabajyoti Baildya and Kumares Ghosh\*

*Department of Chemistry, University of Kalyani, Kalyani-741235, India.  
Email: ghosh\_k2003@yahoo.co.in*

**Table 1S.** Results of gelation test for **1-3**.

| <b>Solvent</b>                          | <b>1</b>                 | <b>2</b>                 | <b>3</b>                 |
|-----------------------------------------|--------------------------|--------------------------|--------------------------|
| DMSO                                    | S                        | S                        | S                        |
| DMF                                     | S                        | S                        | S                        |
| THF                                     | S                        | S                        | S                        |
| CH <sub>3</sub> CN                      | I                        | I                        | I                        |
| CH <sub>3</sub> OH                      | I                        | I                        | I                        |
| Nitrobenzene                            | S                        | S                        | S                        |
| CHCl <sub>3</sub>                       | S                        | S                        | S                        |
| Diethyl ether                           | I                        | I                        | I                        |
| DCM                                     | S                        | S                        | S                        |
| Toluene                                 | S                        | S                        | S                        |
| 1,4 Dioxane                             | S                        | S                        | S                        |
| 1,4-Dioxane: H <sub>2</sub> O (4:1 v/v) | <b>G ( 18<br/>mg/mL)</b> | <b>G ( 34<br/>mg/mL)</b> | <b>G ( 28<br/>mg/mL)</b> |
| DMSO: H <sub>2</sub> O (1:1, v/v)       | P                        | P                        | P                        |
| DMF: H <sub>2</sub> O (4:1, v/v)        | <b>G ( 20<br/>mg/mL)</b> | P                        | P                        |
| DMSO: H <sub>2</sub> O (4:1, v/v)       | <b>G ( 20<br/>mg/mL)</b> | P                        | P                        |

G = Gel (mg); I = Insoluble; P = Precipitation. Gelation was primarily investigated by inversion of vial method after 10-15 mins of sample preparation ([Gelator] = 20 mg/mL).

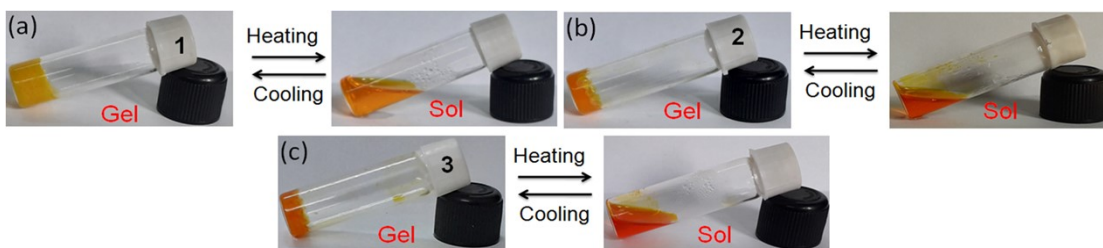

**Figure 1S.** Pictorial representation of the thermo reversibility of the 1,4 Diox- H<sub>2</sub>O (4:1, v/v) gels of (a) 1, (b) 2 and (c) 3.

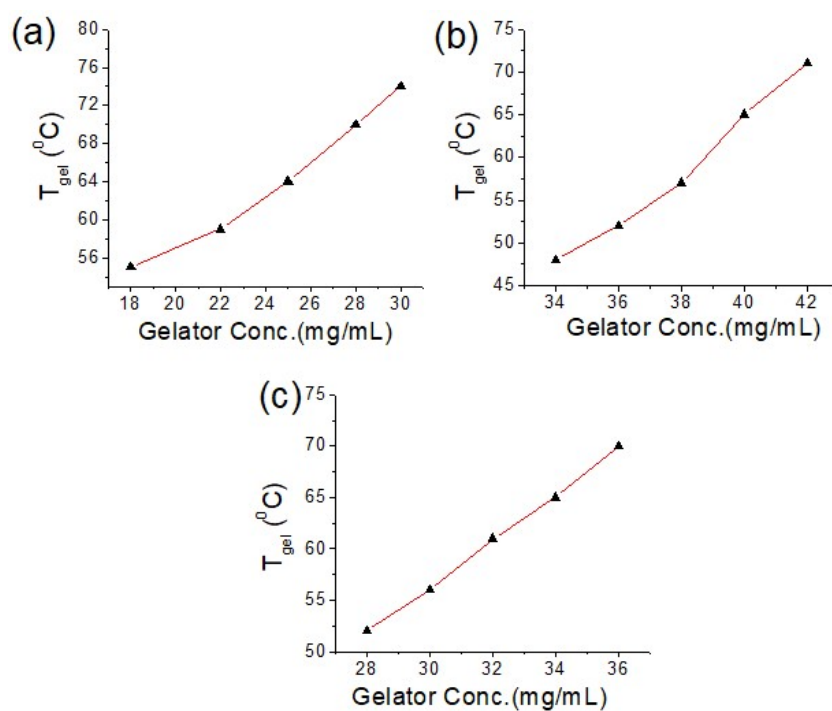

**Figure 2S.** T<sub>gel</sub> vs gelators conc. (mg/mL) plots of (a) 1, (b) 2 and (c) 3.

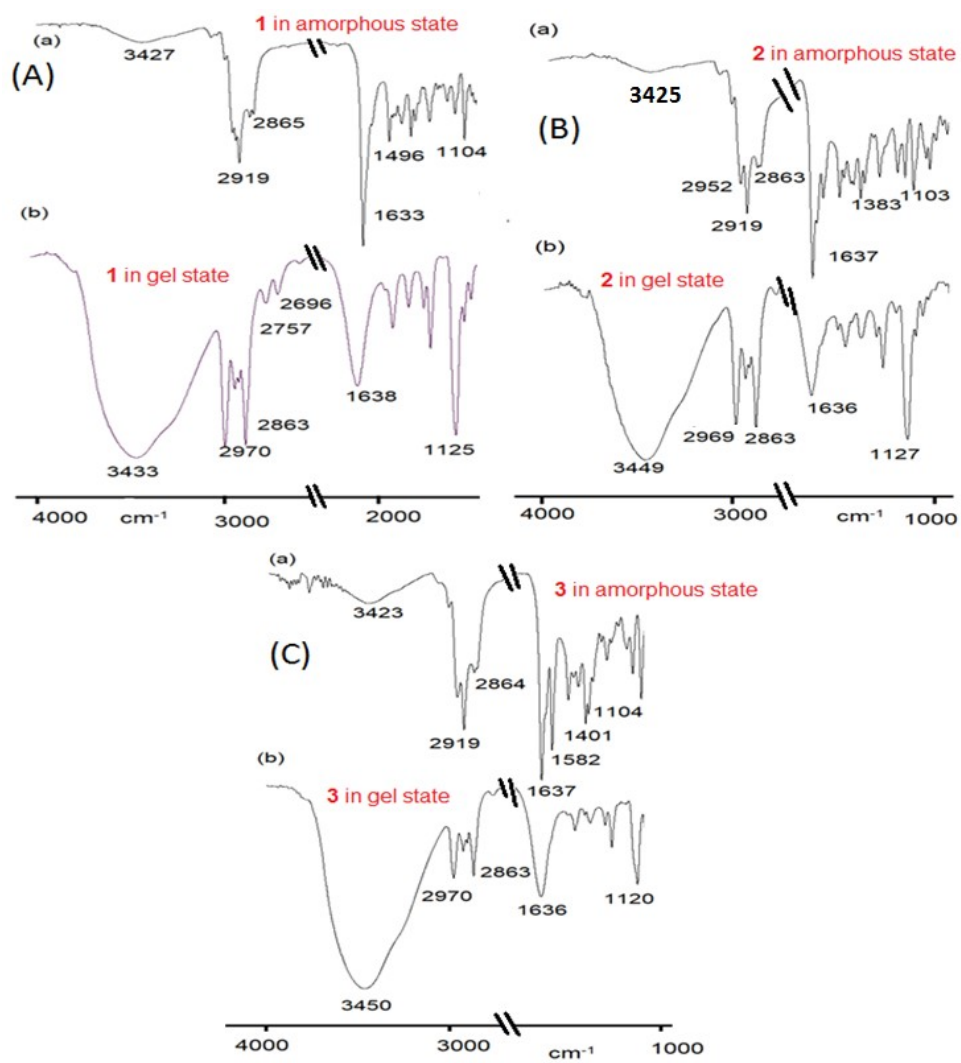

**Figure 3S.** Partial FTIR spectra of (A) **1** in (a) amorphous and (b) gel state, (B) **2** in (a) amorphous and (b) gel state and (C) **3** in (a) amorphous and (b) gel state.

**Table 2S.** Major electronic transitions for **1** in aggregated form in 1,4-dioxane-water medium.

| <b>Transition No.</b> | <b>Energy (cm<sup>-1</sup>)</b> | <b>Wavelength <math>\lambda_{\max}</math>(nm)</b> | <b>Oscillator Strength (f)</b> | <b>Major compositions (contribution)</b>   |
|-----------------------|---------------------------------|---------------------------------------------------|--------------------------------|--------------------------------------------|
| 1                     | 21564.04                        | 463.735                                           | 0.0283                         | H-1→L+1 (19%), H→L (21%), H→L+1 (26%)      |
| 2                     | 21944.73                        | 455.6902                                          | 0.0261                         | H→L+1 (18%)                                |
| 3                     | 21985.06                        | 454.8543                                          | 0.0195                         | H-14→L+3 (20%), H-1→L+2 (17%), H→L+2 (23%) |
| 4                     | 22375.43                        | 446.9187                                          | 0.0211                         | H-14→L+3 (16%), H→L+2 (15%)                |
| 5                     | 22400.44                        | 446.4199                                          | 0.0028                         | H-21→L (18%), H-19→L (22%)                 |
| 6                     | 22700.47                        | 440.5194                                          | 0.0041                         | H-20→L+1 (26%), H-17→L+1 (19%)             |
| 7                     | 22923.08                        | 436.2415                                          | 0.0216                         | H→L+3 (19%)                                |
| 8                     | 22982.77                        | 435.1086                                          | 0.0011                         | H-1→L (18%), H-1→L+1 (38%), H→L+1 (30%)    |
| 9                     | 23199.73                        | 431.0395                                          | 0.0298                         | H-1→L+3 (18%), H→L+3 (25%)                 |
| 10                    | 23280.39                        | 429.5461                                          | 0.0003                         | H-1→L (43%), H-1→L+1 (18%), H→L (27%)      |
| 11                    | 23640.92                        | 422.9954                                          | 0.0225                         | H-4→L+1 (30%), H-4→L+2 (24%)               |
| 12                    | 23953.05                        | 417.4833                                          | 0.0025                         | H-4→L (26%), H-4→L+2 (19%)                 |
| 13                    | 24076.46                        | 415.3435                                          | 0.0093                         | H-2→L+1 (54%)                              |
| 14                    | 24115.98                        | 414.6629                                          | 0.0027                         | H-1→L+2 (41%), H→L+2 (29%)                 |
| 15                    | 24165.98                        | 413.8048                                          | 0.0059                         | H-3→L (35%)                                |
| 16                    | 24187.76                        | 413.4322                                          | 0.0088                         | H-3→L (48%)                                |
| 17                    | 24428.92                        | 409.3509                                          | 0.0004                         | H-2→L (71%), H-2→L+1 (24%)                 |
| 18                    | 24705.57                        | 404.767                                           | 0.0003                         | H-3→L+1 (92%)                              |
| 19                    | 24749.93                        | 404.0416                                          | 0                              | H-1→L+3 (52%), H→L+3 (39%)                 |
| 20                    | 24765.25                        | 403.7915                                          | 0.0014                         | H-2→L+2 (88%)                              |
| 21                    | 24851.56                        | 402.3893                                          | 0.0009                         | H-7→L+1 (41%), H-4→L+1 (16%)               |
| 22                    | 25105.62                        | 398.3172                                          | 0.0007                         | H-2→L+3 (82%)                              |
| 23                    | 25190.31                        | 396.9781                                          | 0.0013                         | H-9→L+1 (31%), H-6→L+1 (27%)               |
| 24                    | 25257.25                        | 395.9259                                          | 0.0004                         | H-9→L+1 (22%), H-6→L (23%), H-6→L+1 (40%)  |
| 25                    | 25533.09                        | 391.6486                                          | 0.0036                         | H-6→L (66%), H-6→L+1 (28%)                 |
| 26                    | 25624.23                        | 390.2556                                          | 0.0026                         | H-5→L (71%)                                |
| <b>27</b>             | <b>25690.37</b>                 | <b>389.2509</b>                                   | <b>0.0444</b>                  | <b>H-4→L+3 (45%)</b>                       |
| 28                    | 25750.06                        | 388.3487                                          | 0.0006                         | H-7→L (32%), H-5→L+1 (38%)                 |
| 29                    | 25832.33                        | 387.1119                                          | 0.0002                         | H-7→L (16%), H-5→L (15%), H-5→L+1 (54%)    |
| 30                    | 25879.91                        | 386.4001                                          | 0.0033                         | H-3→L+2 (84%)                              |

**Table 3S.** Major electronic transitions for **2** in aggregated form in 1,4-dioxane-water medium.

| Transition No. | Energy (cm <sup>-1</sup> ) | Wavelength (nm) | Oscillator Strength (f) | Major contribution                    |
|----------------|----------------------------|-----------------|-------------------------|---------------------------------------|
| 1              | 20129.18                   | 496.7913        | 0.0963                  | H→L (22%), H→L+2 (17%)                |
| 2              | 20230                      | 494.3154        | 0.0079                  | H-6→L (18%)                           |
| 3              | 20499.39                   | 487.8195        | 0.0116                  | H-13→L (21%)                          |
| 4              | 21874.56                   | 457.152         | 0.0296                  | H-16→L+1 (29%), H-14→L+1 (44%)        |
| 5              | 22875.5                    | 437.149         | 0.0613                  | H→L (70%)                             |
| 6              | 23675.6                    | 422.3758        | 0.0018                  | H-3→L+1 (25%), H→L+1 (72%)            |
| 7              | 24442.63                   | 409.1212        | 0.0102                  | H-2→L (67%), H-1→L (23%)              |
| 8              | 24471.67                   | 408.6358        | 0.0237                  | H-3→L (56%)                           |
| 9              | 24735.41                   | 404.2787        | 0.0603                  | H-3→L+2 (17%), H→L+2 (41%)            |
| 10             | 24811.23                   | 403.0433        | 0.003                   | H-2→L (27%), H-1→L (63%)              |
| 11             | 25019.32                   | 399.6911        | 0.0007                  | H-2→L+1 (74%), H-1→L+1 (19%)          |
| 12             | 25098.36                   | 398.4324        | 0.0029                  | H-3→L+1 (66%), H→L+1 (24%)            |
| 13             | 25213.7                    | 396.6098        | 0.016                   | H-6→L (54%)                           |
| 14             | 25621.81                   | 390.2924        | 0.0001                  | H-2→L+1 (20%), H-1→L+1 (72%)          |
| 15             | 25654.88                   | 389.7893        | 0.0623                  | H-3→L+2 (63%), H→L+3 (23%)            |
| 16             | 25740.38                   | 388.4947        | 0                       | H-4→L (91%)                           |
| 17             | 25843.62                   | 386.9427        | 0.0006                  | H-6→L+1 (89%)                         |
| 18             | 26317.87                   | 379.9699        | 0.0975                  | H-8→L (25%), H-5→L (15%), H→L+3 (24%) |
| 19             | 26335.62                   | 379.7139        | 0.0063                  | H-2→L+2 (32%), H-1→L+2 (59%)          |
| 20             | 26387.23                   | 378.9711        | 0                       | H-4→L+1 (93%)                         |
| 21             | 26523.54                   | 377.0235        | 0.0106                  | H-2→L+2 (53%), H-1→L+2 (36%)          |
| 22             | 26636.46                   | 375.4253        | 0.0244                  | H-5→L (71%)                           |
| <b>23</b>      | <b>26663.08</b>            | <b>375.0505</b> | <b>0.1096</b>           | <b>H-6→L+2 (36%)</b>                  |
| 24             | 27136.52                   | 368.507         | 0.0333                  | H-11→L (22%), H-8→L+2 (16%)           |
| 25             | 27314.77                   | 366.1023        | 0.0023                  | H-5→L+1 (87%)                         |
| 26             | 27341.39                   | 365.7459        | 0.0124                  | H-11→L+1 (33%), H-8→L+1 (30%)         |
| 27             | 27368.81                   | 365.3794        | 0.0449                  | H-4→L+2 (66%)                         |
| 28             | 27422.04                   | 364.6701        | 0.1059                  | H-4→L+2 (22%), H-3→L+3 (37%)          |
| 29             | 27543.03                   | 363.0683        | 0.0003                  | H-10→L (16%), H-9→L (64%)             |
| 30             | 27588.19                   | 362.4739        | 0.002                   | H-7→L (33%)                           |

**Table 4S.** Major electronic transitions for **3** in aggregated form in 1,4-dioxane-water medium.

| Transition No. | Energy (cm <sup>-1</sup> ) | Wavelength (nm) | Oscillator Strength (f) | Major contribution                        |
|----------------|----------------------------|-----------------|-------------------------|-------------------------------------------|
| 1              | 19430.7                    | 514.6494        | 0.0065                  | H→L (36%)                                 |
| 2              | 19706.54                   | 507.4456        | 0.0009                  | H-4→L+2 (15%)                             |
| 3              | 19803.33                   | 504.9656        | 0.0107                  | H-2→L+2 (17%), H→L (31%)                  |
| 4              | 19923.51                   | 501.9197        | 0.0018                  | H-16→L+1 (22%)                            |
| 5              | 20221.93                   | 494.5126        | 0.0013                  | H-20→L (65%)                              |
| 6              | 20809.1                    | 480.5589        | 0.0027                  | H-1→L (75%)                               |
| 7              | 21340.62                   | 468.5899        | 0.0004                  | H→L+1 (74%)                               |
| <b>8</b>       | <b>22470.61</b>            | <b>445.0258</b> | <b>0.0116</b>           | <b>H-1→L+1 (65%)</b>                      |
| 9              | 22639.98                   | 441.6964        | 0.009                   | H→L+2 (58%)                               |
| 10             | 22877.92                   | 437.1027        | 0.0039                  | H-2→L (28%)                               |
| 11             | 23110.2                    | 432.7093        | 0.0005                  | H-7→L (16%), H-6→L (23%), H-2→L (21%)     |
| 12             | 23425.57                   | 426.884         | 0.001                   | H-4→L (48%), H-2→L (37%)                  |
| 13             | 24203.89                   | 413.1567        | 0.0001                  | H-3→L (92%)                               |
| 14             | 24489.41                   | 408.3397        | 0.0014                  | H-2→L+1 (43%)                             |
| 15             | 24720.89                   | 404.5161        | 0.0057                  | H-16→L (34%), H-5→L (16%)                 |
| 16             | 24762.83                   | 403.831         | 0.0011                  | H-5→L (82%)                               |
| 17             | 24976.57                   | 400.3752        | 0.0016                  | H-4→L+1 (44%)                             |
| 18             | 25182.24                   | 397.1052        | 0.0004                  | H-7→L (55%), H-6→L (37%)                  |
| 19             | 25274.19                   | 395.6606        | 0.0026                  | H-10→L (16%), H-1→L+2 (24%), H→L+3 (17%)  |
| 20             | 25391.95                   | 393.8257        | 0.0104                  | H-16→L (21%), H-10→L (45%)                |
| <b>21</b>      | <b>25945.24</b>            | <b>385.4271</b> | <b>0.0723</b>           | <b>H→L+3 (18%)</b>                        |
| 22             | 25990.41                   | 384.7573        | 0.0001                  | H-8→L (100%)                              |
| 23             | 26252.54                   | 380.9155        | 0.0003                  | H-15→L (19%), H-11→L (16%), H-3→L+1 (35%) |
| 24             | 26292.87                   | 380.3313        | 0.0002                  | H-15→L (30%), H-13→L (17%), H-3→L+1 (34%) |
| 25             | 26454.18                   | 378.0121        | 0.0001                  | H-11→L (34%), H-9→L (36%), H-3→L+1 (16%)  |
| 26             | 26496.93                   | 377.4023        | 0.0117                  | H-2→L+3 (20%), H-1→L+3 (23%)              |
| 27             | 26566.29                   | 376.4169        | 0.0017                  | H-11→L (24%), H-9→L (50%)                 |
| 28             | 26614.68                   | 375.7324        | 0.004                   | H-6→L+1 (16%)                             |
| 29             | 26834.87                   | 372.6494        | 0.0001                  | H-12→L (72%), H-11→L (17%)                |
| 30             | 26938.11                   | 371.2213        | 0.0004                  | H-5→L+1 (97%)                             |

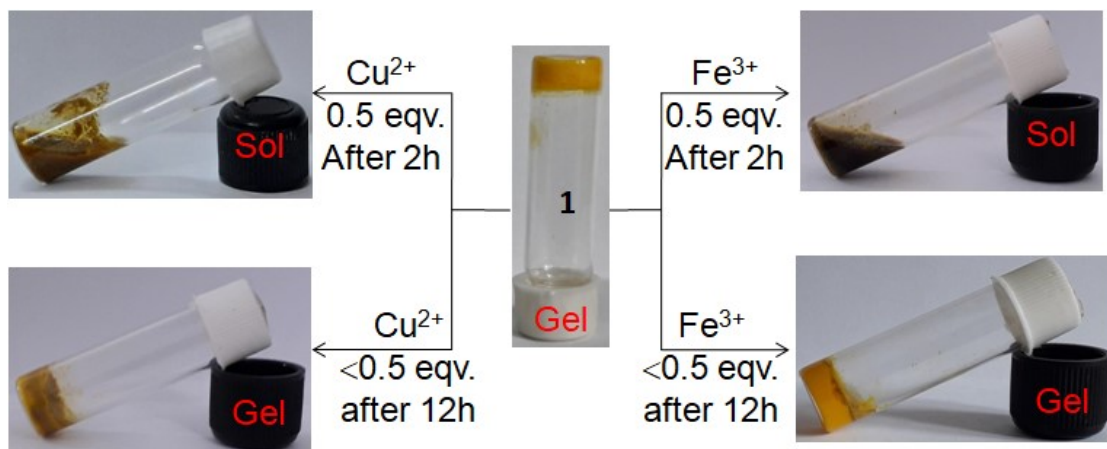

**Figure 4S.** Picture showing the minimum amounts of metal ions required for gel-to-sol phase transition of 1,4 dioxane-H<sub>2</sub>O (4:1, v/v) gel of **1**.

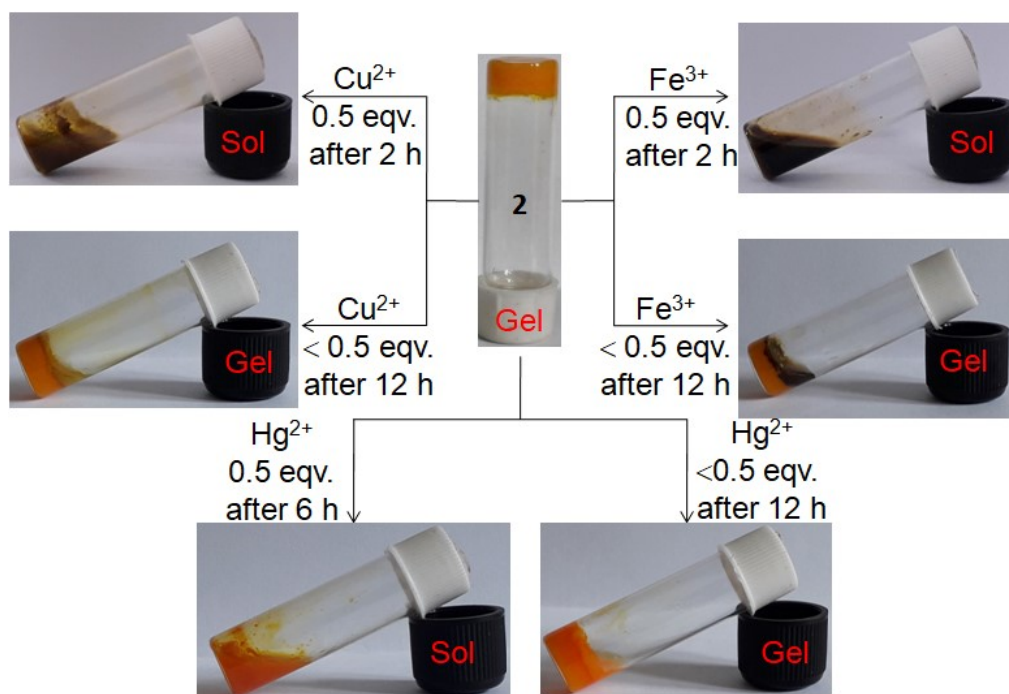

**Figure 5S.** Picture showing the minimum amounts of metal ions required for gel-to-sol phase transition of 1,4 dioxane-H<sub>2</sub>O (4:1, v/v) gel of **2**.

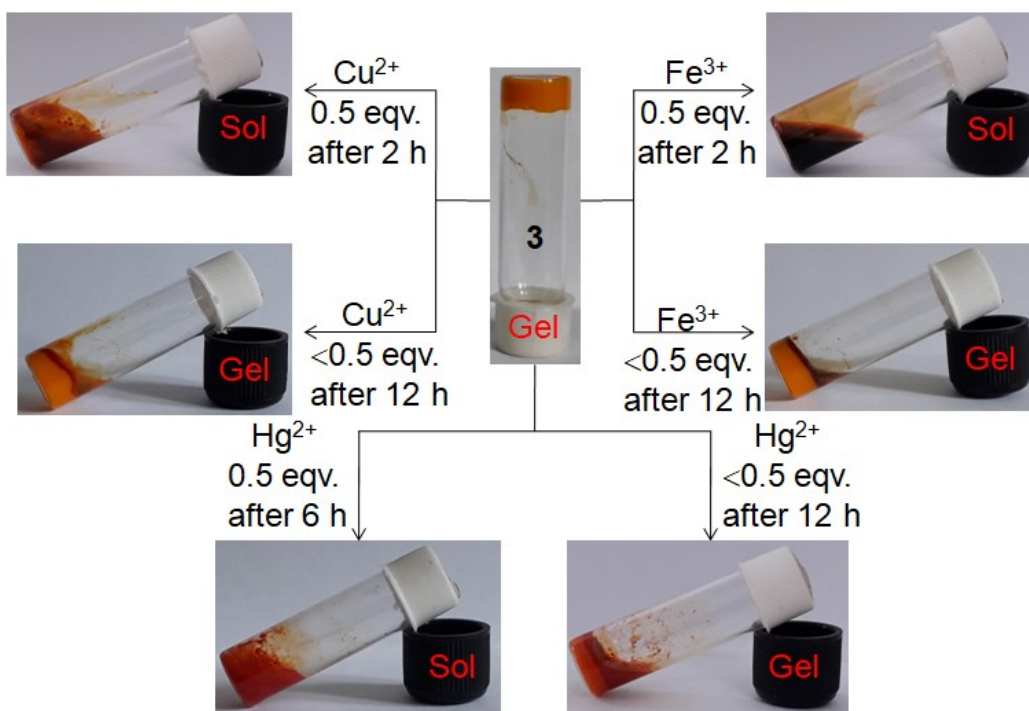

**Figure 6S.** Picture showing the minimum amounts of metal ions required for gel-to-sol phase transition of 1,4 dioxane-H<sub>2</sub>O (4:1, v/v) gel of **3**.

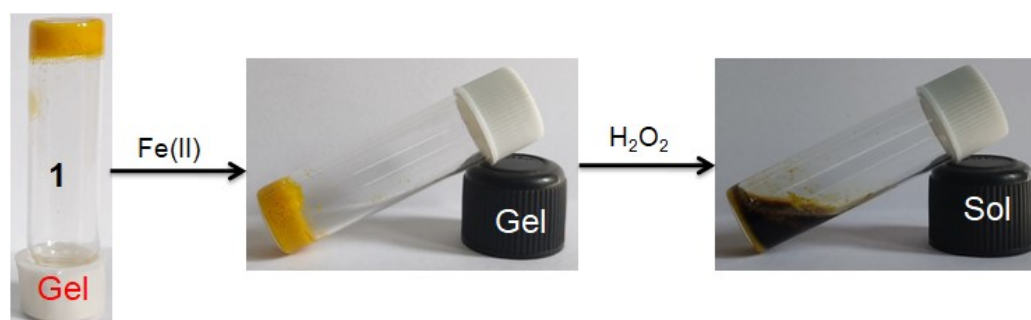

**Figure 7S.** Chemical responsiveness of the yellow colored 1,4 dioxane-H<sub>2</sub>O (4:1, v/v) gel of **1** in different conditions.



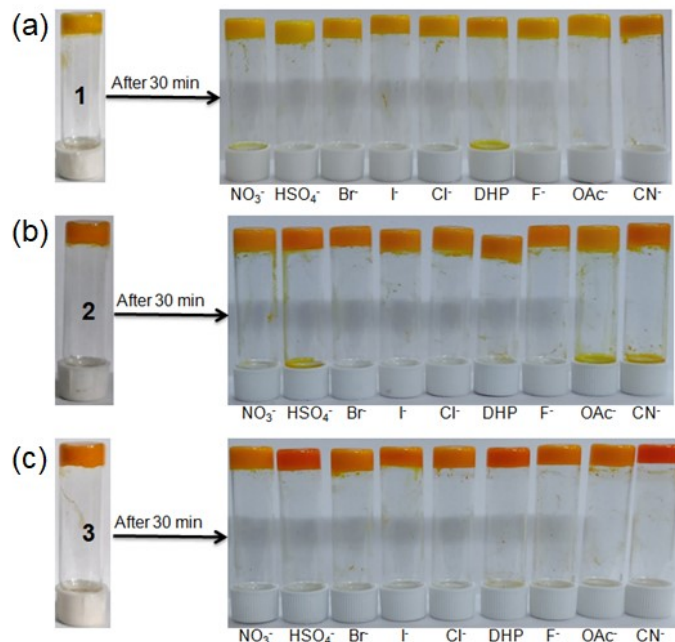

**Figure 8S.** Photograph showing the phase changes of gels (a) **1**, (b) **2** and (c) **3** in 1,4-dioxane-H<sub>2</sub>O (4:1, v/v) in the presence of equiv. amount of different anions after 30 mins [at mgc; all were used as tetraethylammonium salts].

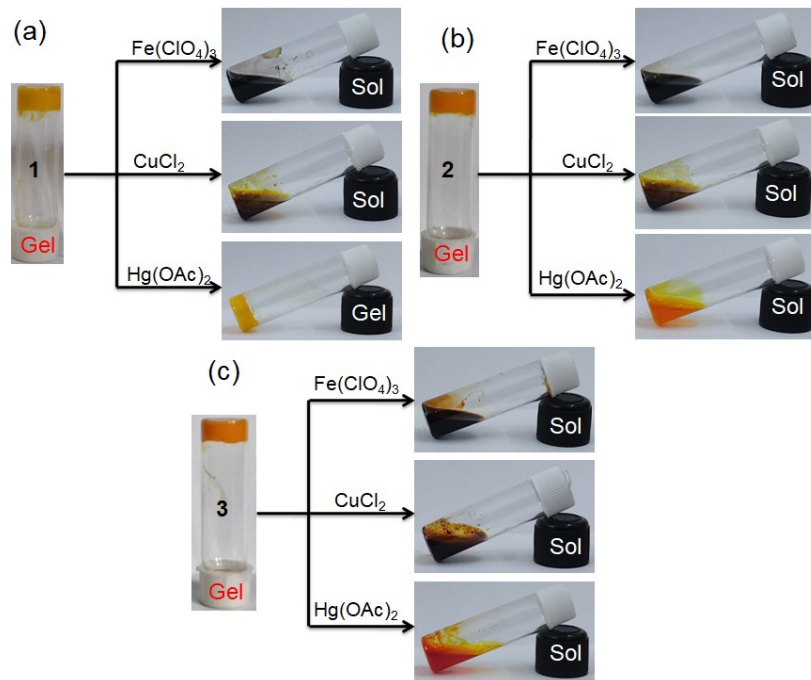

**Figure 9S.** Photograph showing the phase changes of gels (a) **1**, (b) **2** and (c) **3** in 1,4-dioxane-H<sub>2</sub>O (4:1, v/v) in the presence of equiv. amount of different anionic salt of Cu<sup>2+</sup>, Fe<sup>3+</sup> and Hg<sup>2+</sup> after 30 mins.

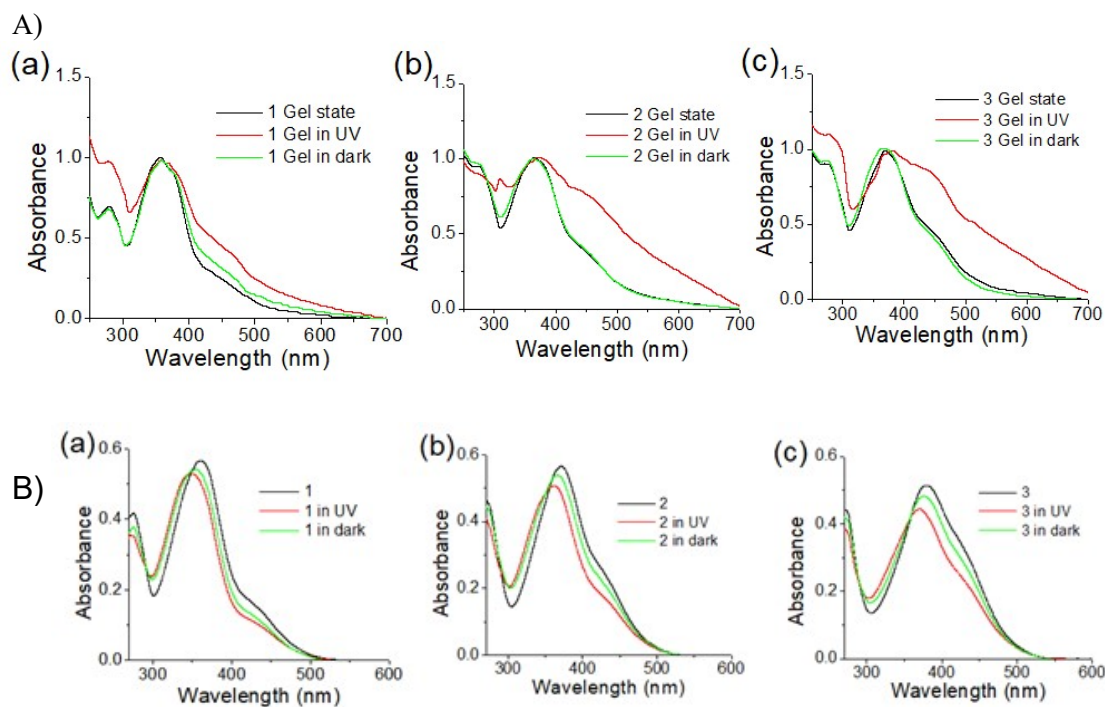

**Figure 10S.** UV-vis study for the isomerisation of (A) gels (a) **1**, (b) **2** and (c) **3** in 1,4-Dioxane-H<sub>2</sub>O (4:1, v/v) and (B) solutions of (a) **1**, (b) **2** and (c) **3** ( $c = 2.5 \times 10^{-5}$  M) in 1,4-Dioxane-H<sub>2</sub>O (4:1, v/v) upon exposure to 390 nm UV light. UV light was exposed on the samples for 1 hour.

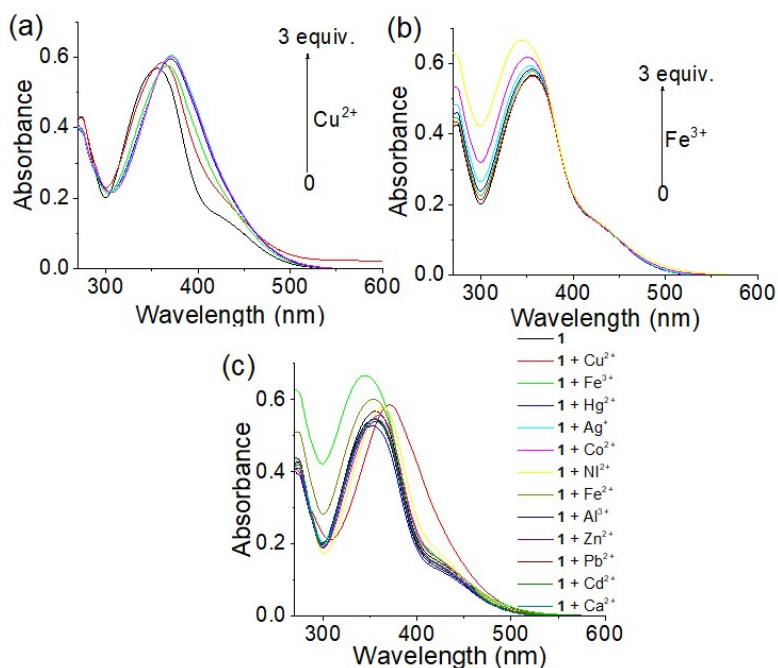

**Figure 11S.** Change in absorbance of **1** ( $c = 2.5 \times 10^{-5}$  M) upon addition of 3 equiv. amounts of (a) Cu<sup>2+</sup>, (b) Fe<sup>3+</sup> and (c) all metals ( $c = 1.0 \times 10^{-3}$  M) in 1,4-dioxane-H<sub>2</sub>O (4:1, v/v).

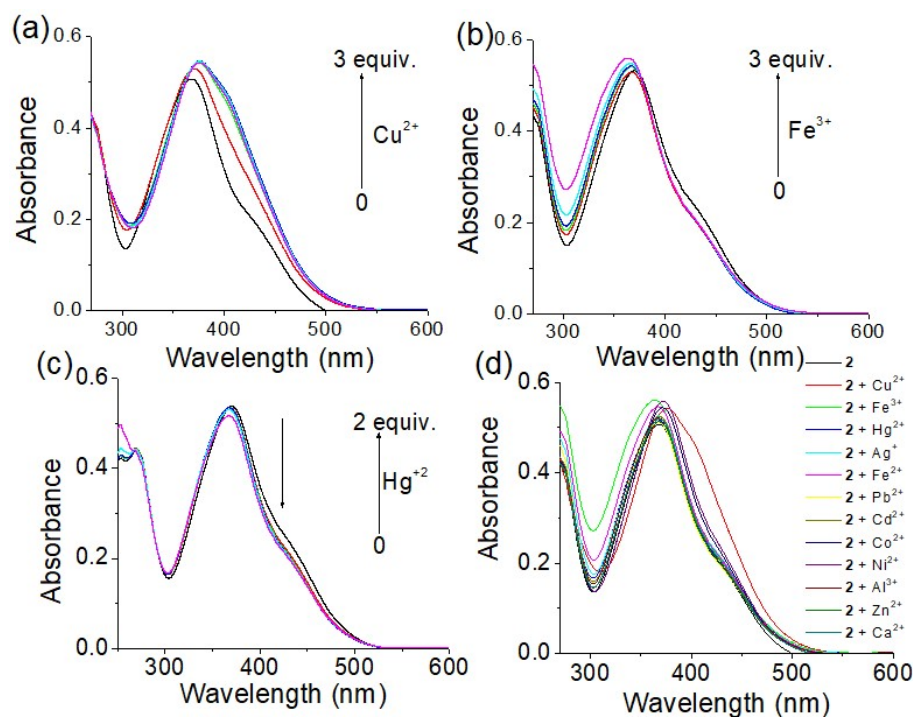

**Figure 12S.** Change in absorbance of **2** ( $c = 2.5 \times 10^{-5}$  M) upon addition of 3 equiv. amounts of (a) Cu<sup>2+</sup>, (b) Fe<sup>3+</sup>, (c) Hg<sup>2+</sup> and (d) all metals ( $c = 1.0 \times 10^{-3}$  M) in 1,4-dioxane-H<sub>2</sub>O (4:1, v/v).

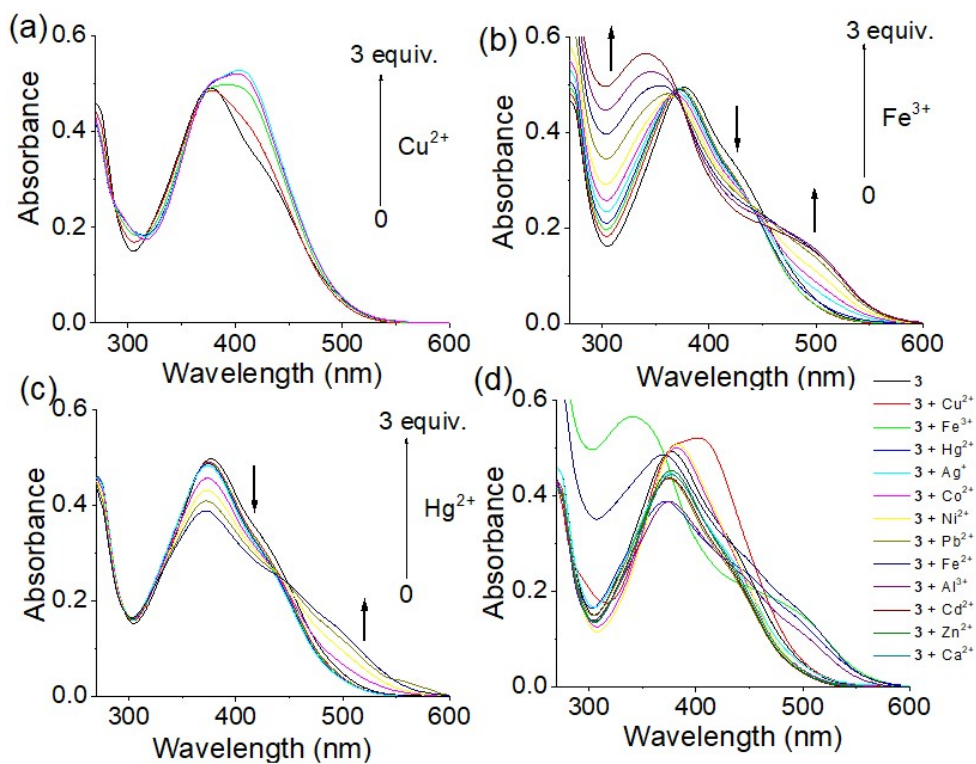

**Figure 13S.** Change in absorbance of **3** ( $c = 2.5 \times 10^{-5}$  M) upon addition of 3 equiv. amounts of (a) Cu<sup>2+</sup>, (b) Fe<sup>3+</sup>, (c) Hg<sup>2+</sup> and (d) all metals ( $c = 1.0 \times 10^{-3}$  M) in 1,4-dioxane-H<sub>2</sub>O (4:1, v/v).

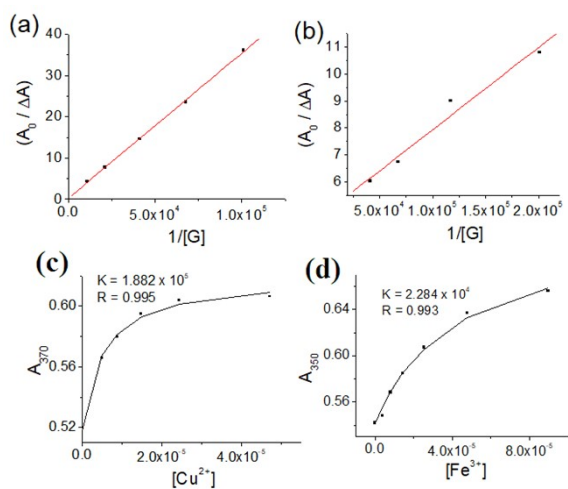

**Figure 14S.** Benesi–Hildebrand plots for **1** ( $c = 2.5 \times 10^{-5}$  M) with (a)  $\text{Fe}^{3+}$  at 350 nm and (b)  $\text{Cu}^{2+}$  at 370 nm ( $c = 1.0 \times 10^{-3}$  M) in 1,4-dioxane:  $\text{H}_2\text{O}$  (4:1, v/v) from UV-vis titration. Non liner binding constant curves for **1** ( $c = 2.5 \times 10^{-5}$  M) with (c)  $\text{Cu}^{2+}$  and (d)  $\text{Fe}^{3+}$ .

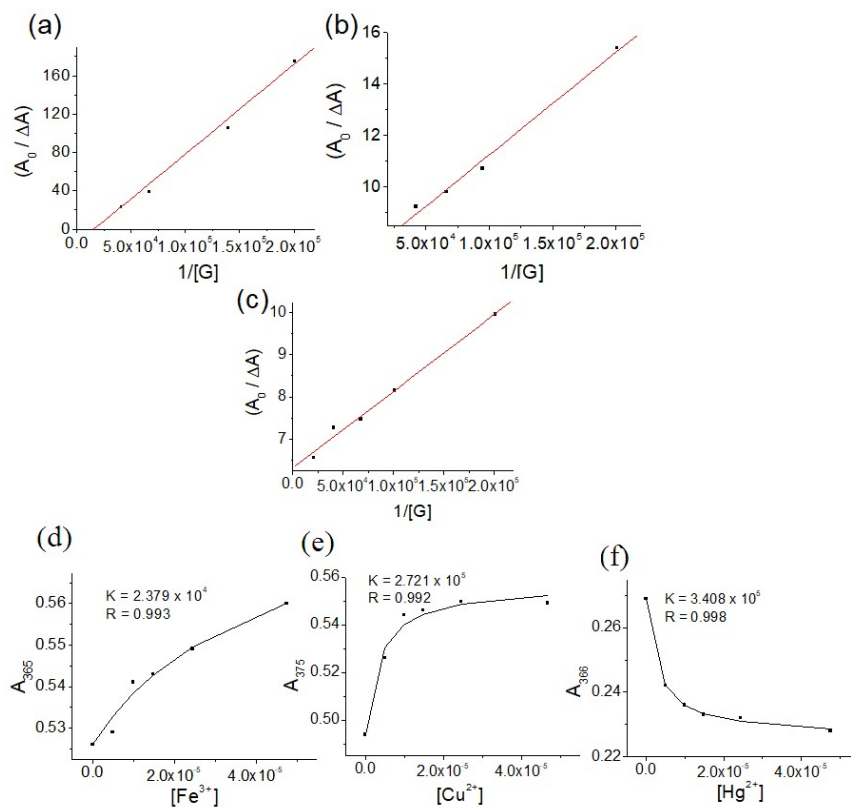

**Figure 15S.** Benesi–Hildebrand plots for **2** ( $c = 2.5 \times 10^{-5}$  M) with (a)  $\text{Fe}^{3+}$  at 365 nm, (b)  $\text{Cu}^{2+}$  at 375 nm and (c)  $\text{Hg}^{2+}$ , at 424 nm ( $c = 1.0 \times 10^{-3}$  M) in 1,4-dioxane:  $\text{H}_2\text{O}$  (4:1, v/v) from UV-vis titration. Non liner binding constant curves for **2** ( $c = 2.5 \times 10^{-5}$  M) with (d)  $\text{Fe}^{3+}$ , (e)  $\text{Cu}^{2+}$  and (f)  $\text{Hg}^{2+}$ .

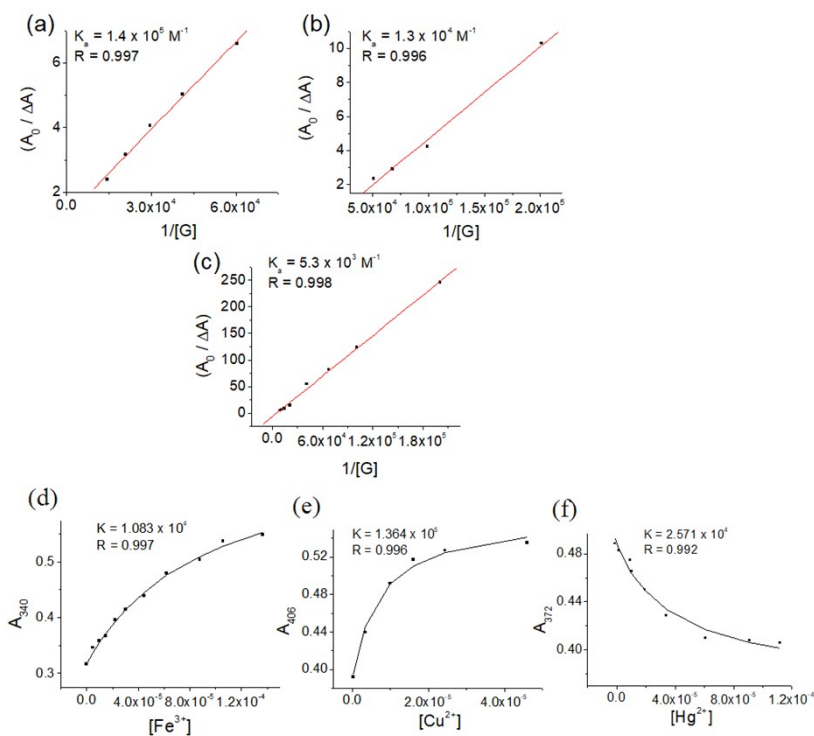

**Figure 16S.** Benesi–Hildebrand plots for **3** ( $c = 2.5 \times 10^{-5} \text{ M}$ ) with (a)  $\text{Fe}^{3+}$  at 340 nm, (b)  $\text{Cu}^{2+}$  at 406 nm and (c)  $\text{Hg}^{2+}$ , at 372 nm ( $c = 1.0 \times 10^{-3} \text{ M}$ ) in 1,4-dioxane :  $\text{H}_2\text{O}$  (4:1, v/v) from UV-vis titration. Non linear binding constant curves for **3** ( $c = 2.5 \times 10^{-5} \text{ M}$ ) with (d)  $\text{Fe}^{3+}$ , (e)  $\text{Cu}^{2+}$  and (f)  $\text{Hg}^{2+}$ .

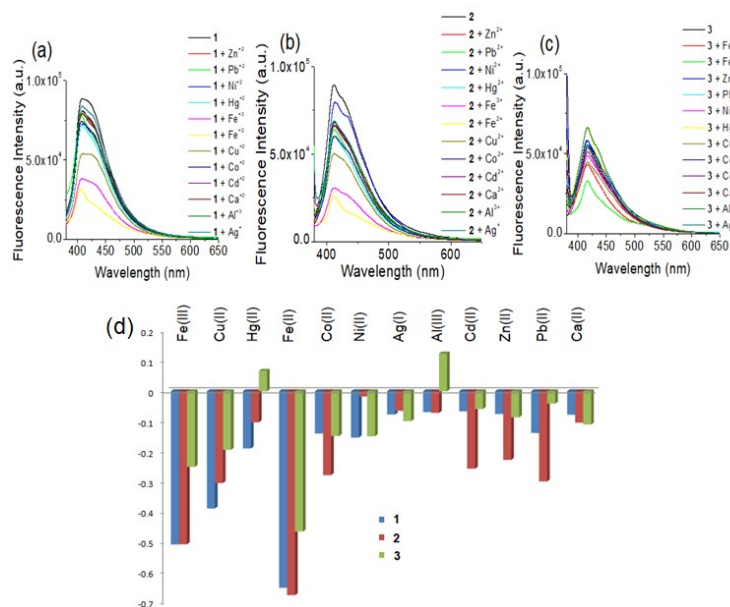

**Figure 17S.** Change in emission of (a) **1** ( $\lambda_{\text{exc}} = 370 \text{ nm}$ ), (b) **2** ( $\lambda_{\text{exc}} = 370 \text{ nm}$ ), (c) **3** ( $\lambda_{\text{exc}} = 370 \text{ nm}$ ) and (d) Change in fluorescence ratio ( $\lambda_{\text{ex}} = 370 \text{ nm}$ ) of **1**, **2** and **3** ( $c = 2.5 \times 10^{-5} \text{ M}$ ) upon addition of 3 equiv. amounts of different metal ions ( $c = 1.0 \times 10^{-3} \text{ M}$ ) in 1,4-dioxane- $\text{H}_2\text{O}$  (4:1, v/v).

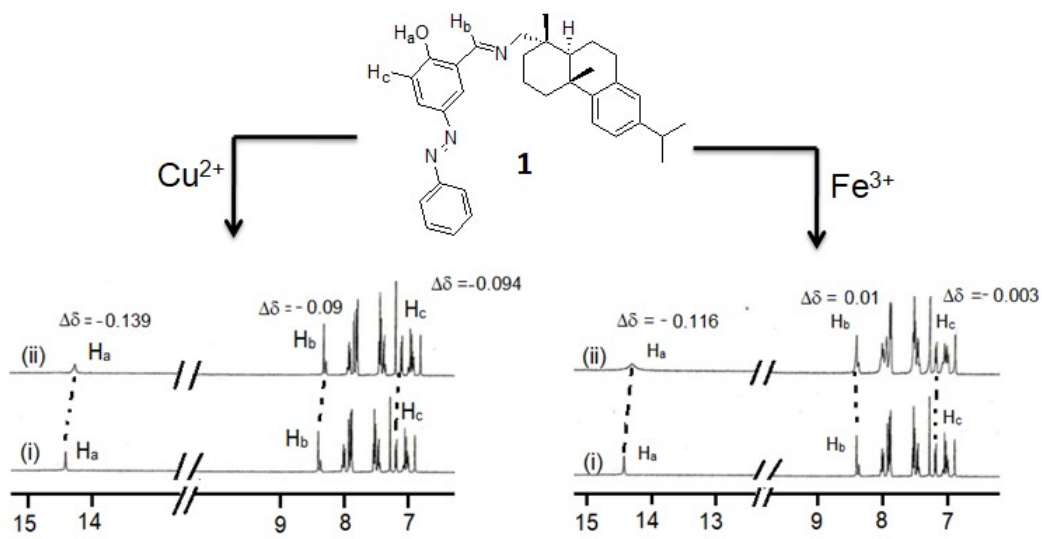

**Figure 18S.** Partial  $^1\text{H}$  NMR (400 MHz) of **1** with equivalent amount of  $\text{Cu}^{2+}$  and  $\text{Fe}^{3+}$  in  $\text{CDCl}_3$ .

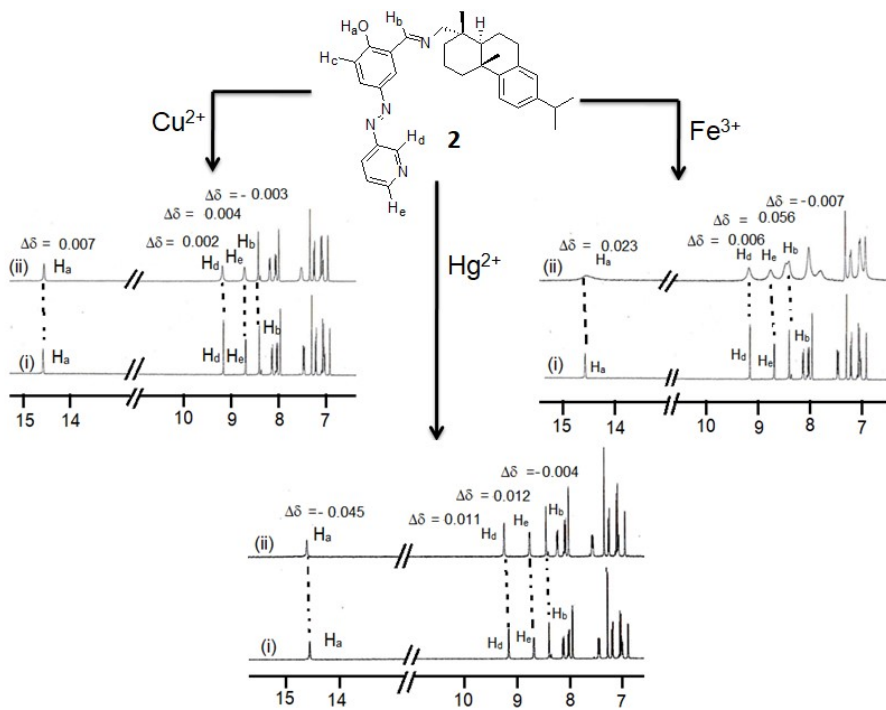

**Figure 19S.** Partial  $^1\text{H}$  NMR (400 MHz) of **2** with equivalent amount of  $\text{Cu}^{2+}$ ,  $\text{Fe}^{3+}$  and  $\text{Hg}^{2+}$  in  $\text{CDCl}_3$ .

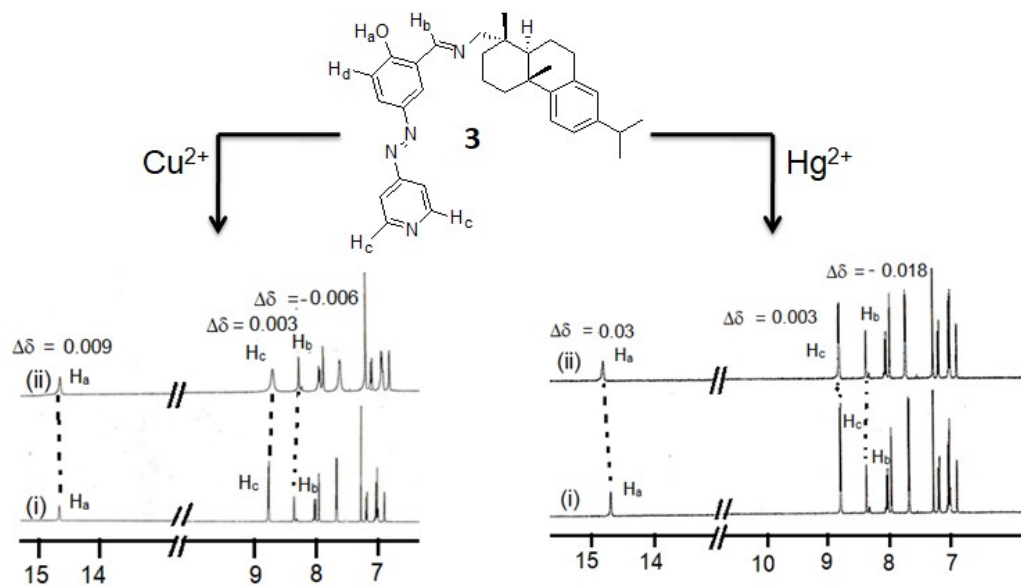

**Figure 20S.** Partial  $^1H$  NMR (400 MHz) of **3** with equivalent amount of  $Cu^{2+}$  and  $Hg^{2+}$  in  $CDCl_3$ .

**Table 5S.** Reported gelators based on imino-phenol motif in gel-phase sensing of metal ions.

| Sl. No. | structure                                                                           | Detection                                      | solvent                          | Interference                                                                                                                                            | Ref. |
|---------|-------------------------------------------------------------------------------------|------------------------------------------------|----------------------------------|---------------------------------------------------------------------------------------------------------------------------------------------------------|------|
| 01      | 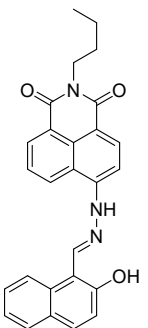   | Visual detection through Gel-to Sol transition | DMF: H <sub>2</sub> O (1:1, v/v) | Fe <sup>3+</sup>                                                                                                                                        | 1    |
| 02      |   | Visual detection through Gel-to Sol transition | DMSO/H <sub>2</sub> O (1:1, v/v) | Cu <sup>2+</sup>                                                                                                                                        | 2    |
| 03      |  | Visual detection through Gel-to Gel transition | DMSO/H <sub>2</sub> O (1:1, v/v) | Fe <sup>3+</sup>                                                                                                                                        | 3    |
| 04      |  | Visual detection through Gel-to Sol transition | DMF                              | CN <sup>-</sup> , F <sup>-</sup> , AcO <sup>-</sup> and H <sub>2</sub> PO <sub>4</sub> <sup>-</sup>                                                     | 4    |
| 05      |  | Visual detection through Gel-to Sol transition | DCM                              | F <sup>-</sup> and Ca <sup>2+</sup> , Zn <sup>2+</sup> , Mn <sup>2+</sup> , Fe <sup>3+</sup> , Cu <sup>2+</sup> , Co <sup>2+</sup> and Ni <sup>2+</sup> | 5    |



|              |                                                                                                                                                                                  |                                                                    |                                                |                                                                                         |   |
|--------------|----------------------------------------------------------------------------------------------------------------------------------------------------------------------------------|--------------------------------------------------------------------|------------------------------------------------|-----------------------------------------------------------------------------------------|---|
| 06           | 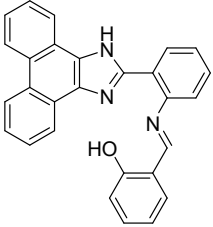                                                                                                |                                                                    | DMF/H <sub>2</sub> O<br>(1:1, v/v)             | Cu <sup>2+</sup>                                                                        | 6 |
| 07           |  <p>( R = hexyl )</p>                                                                           | Visual<br>detection<br>through<br>Gel-to<br>Solution<br>transition | Ethylene<br>glycol                             | Al <sup>3+</sup>                                                                        | 7 |
| This<br>work |  <p>R = </p> | Visual<br>detection<br>through<br>Gel-to Sol<br>transition         | 1,4-dioxane-<br>H <sub>2</sub> O (4:1,<br>v/v) | Fe <sup>3+</sup> , Cu <sup>2+</sup><br>and Hg <sup>2+</sup><br>with good<br>sensitivity | - |

**<sup>1</sup>H NMR (CDCl<sub>3</sub>, 400 MHz) of 1**

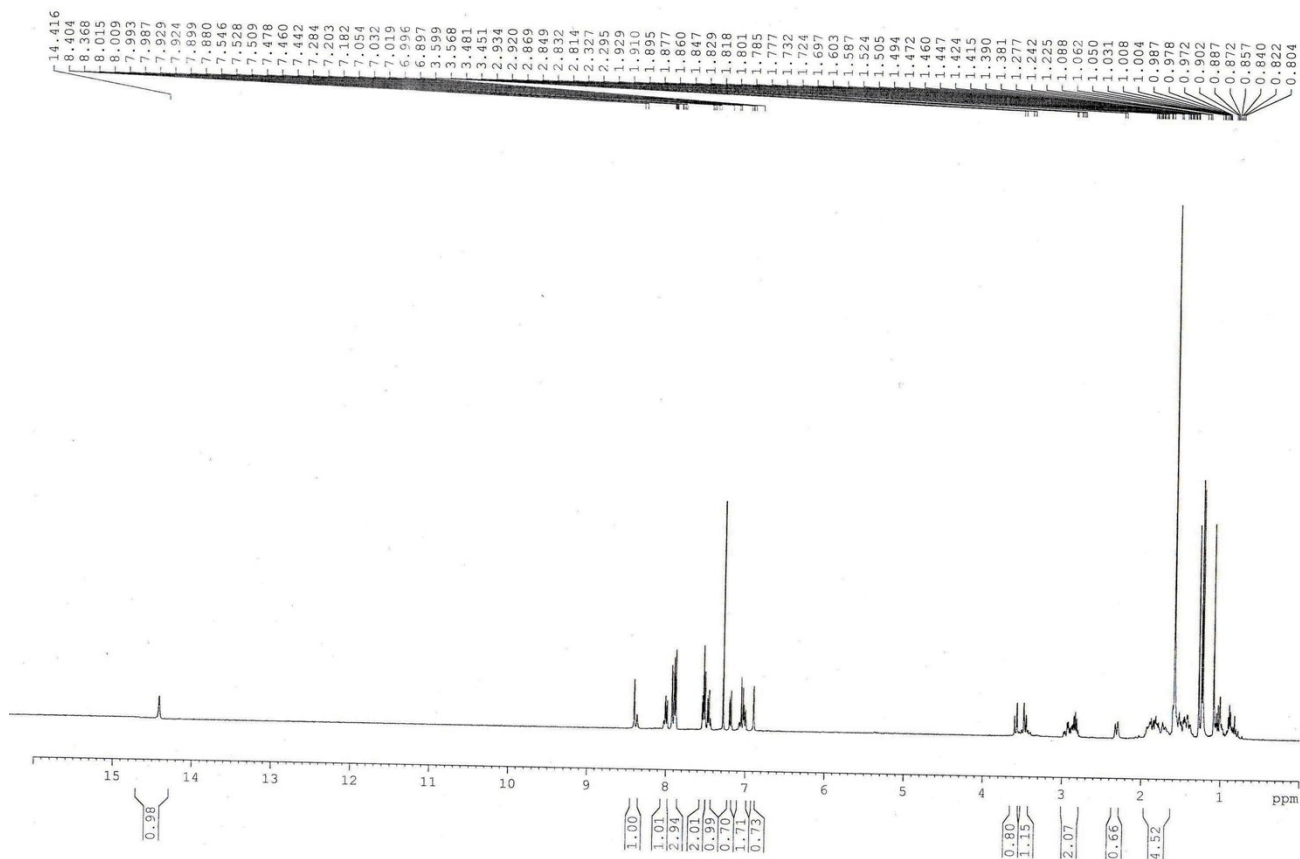

**$^{13}\text{C}$  NMR ( $\text{CDCl}_3$ , 100 MHz) of 1**

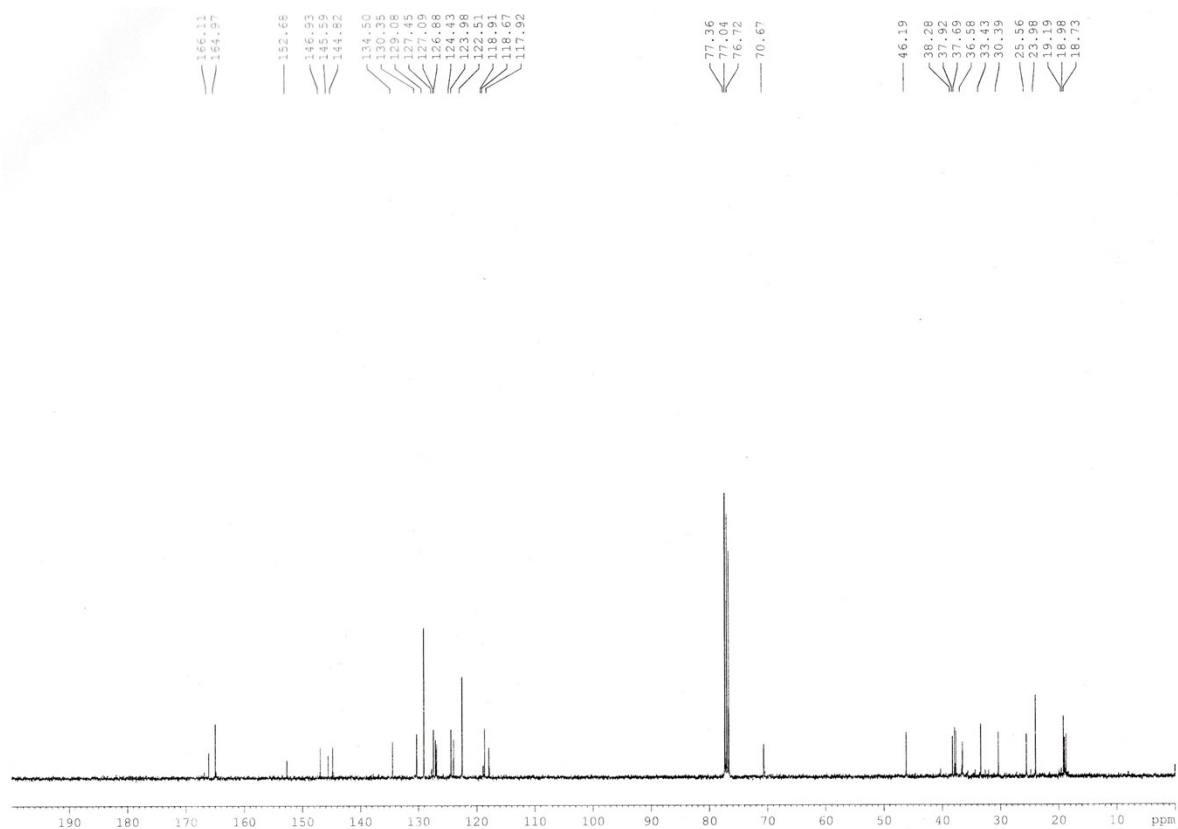

**Mass spectrum of 1.**

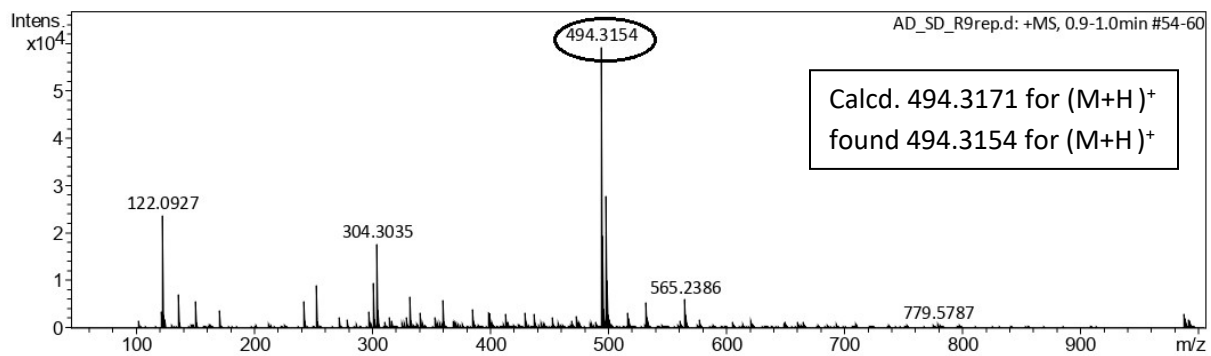

**<sup>1</sup>H NMR (CDCl<sub>3</sub>, 400 MHz) of 2**

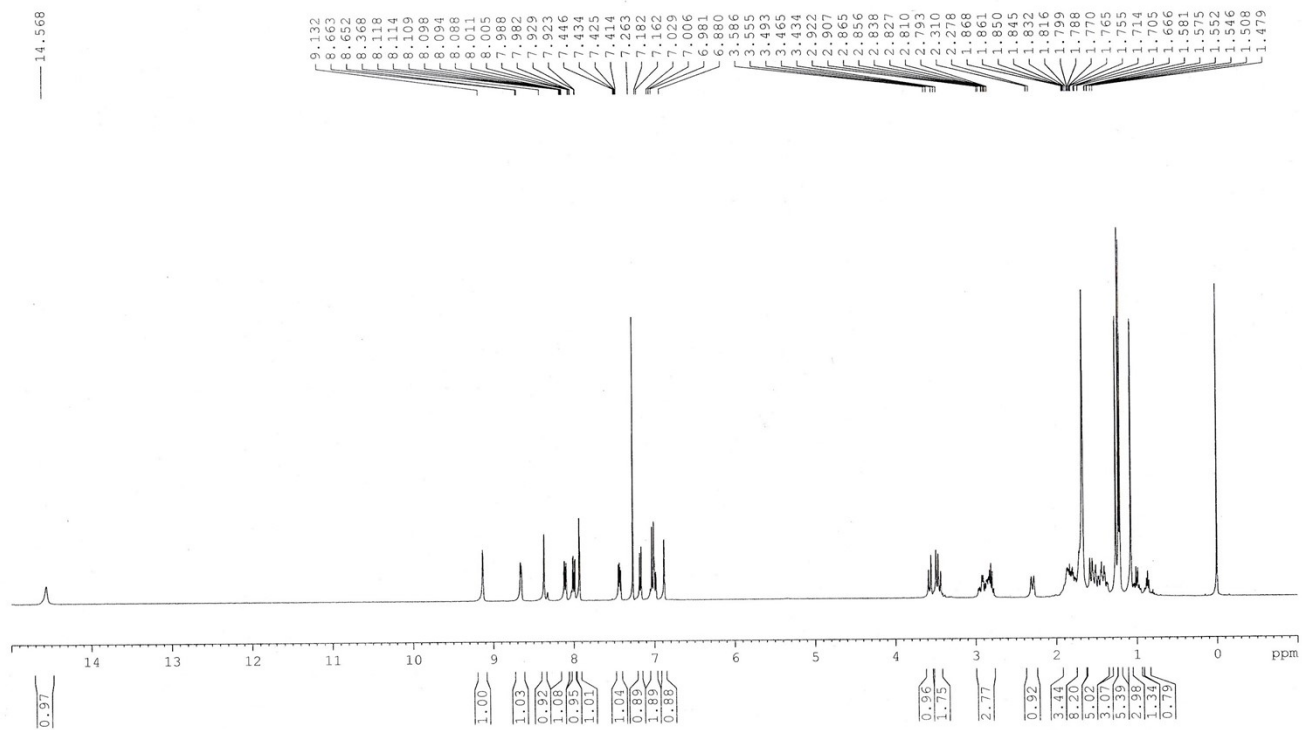

**$^{13}\text{C}$  NMR (CDCl<sub>3</sub>, 100 MHz) of 2**

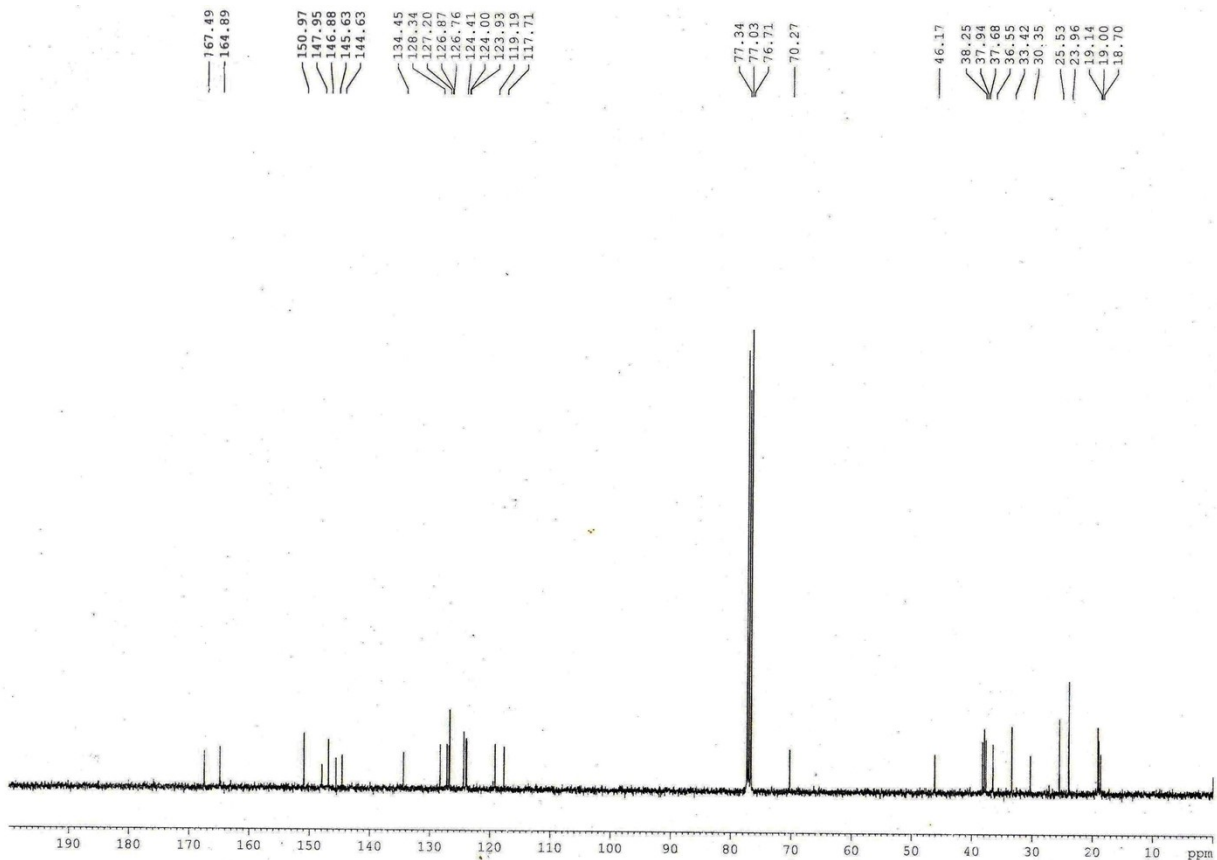

**Mass spectrum of 2.**

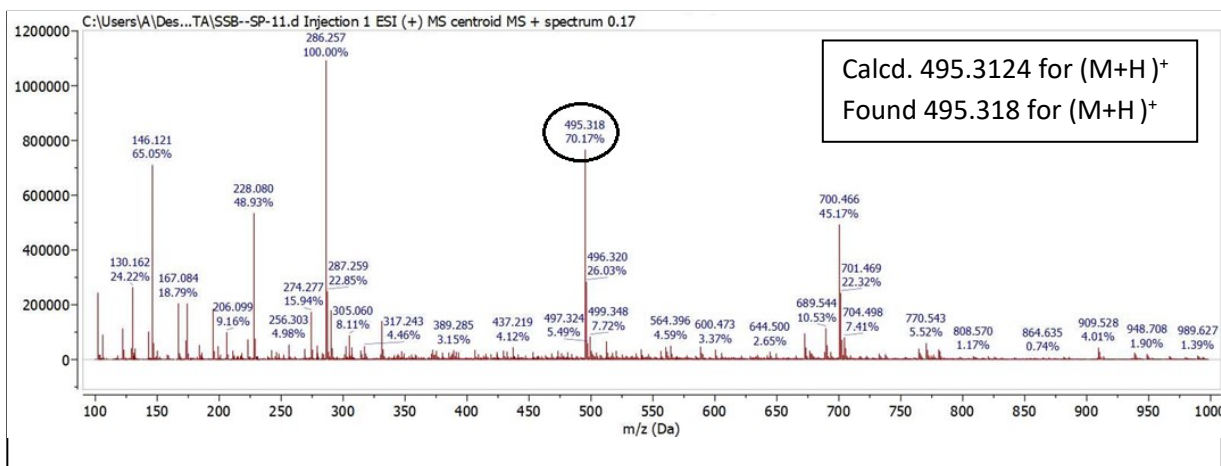

**<sup>1</sup>H NMR (CDCl<sub>3</sub>, 400 MHz) of 3**

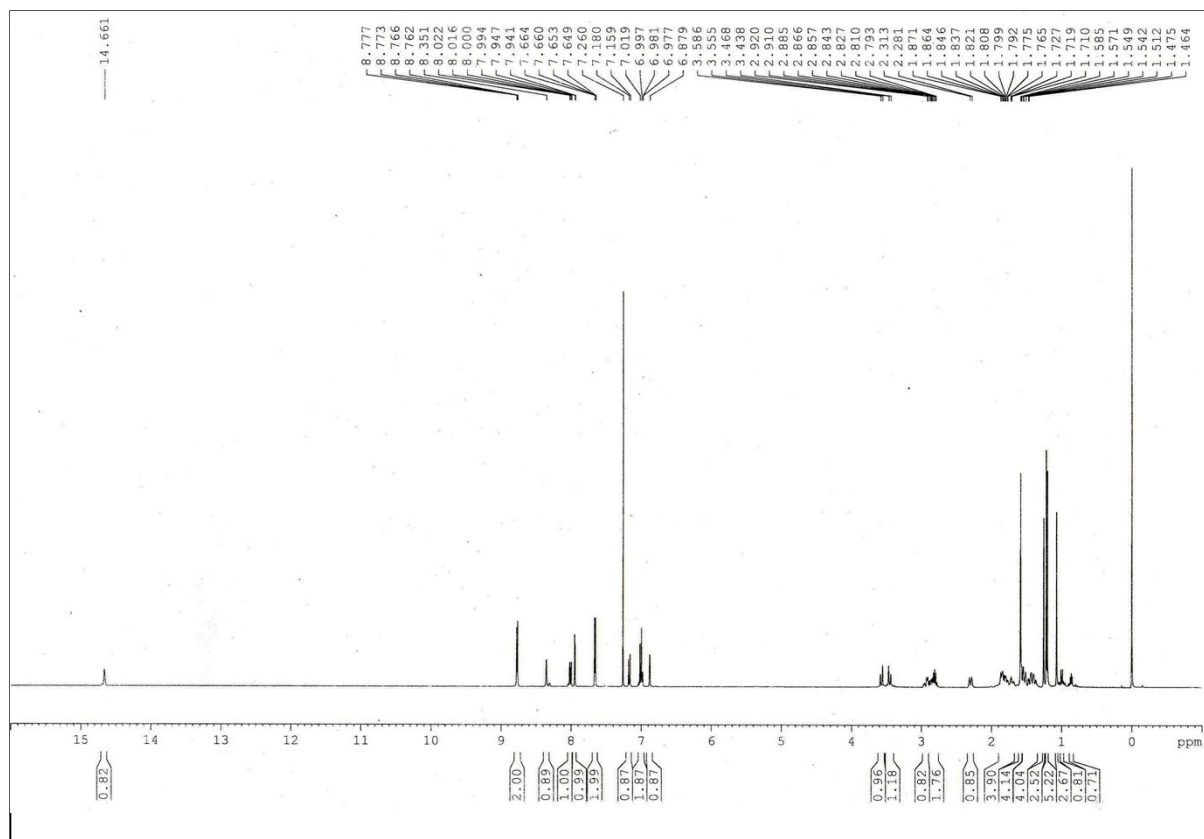

**<sup>13</sup>C NMR (CDCl<sub>3</sub>, 100 MHz) of 3**

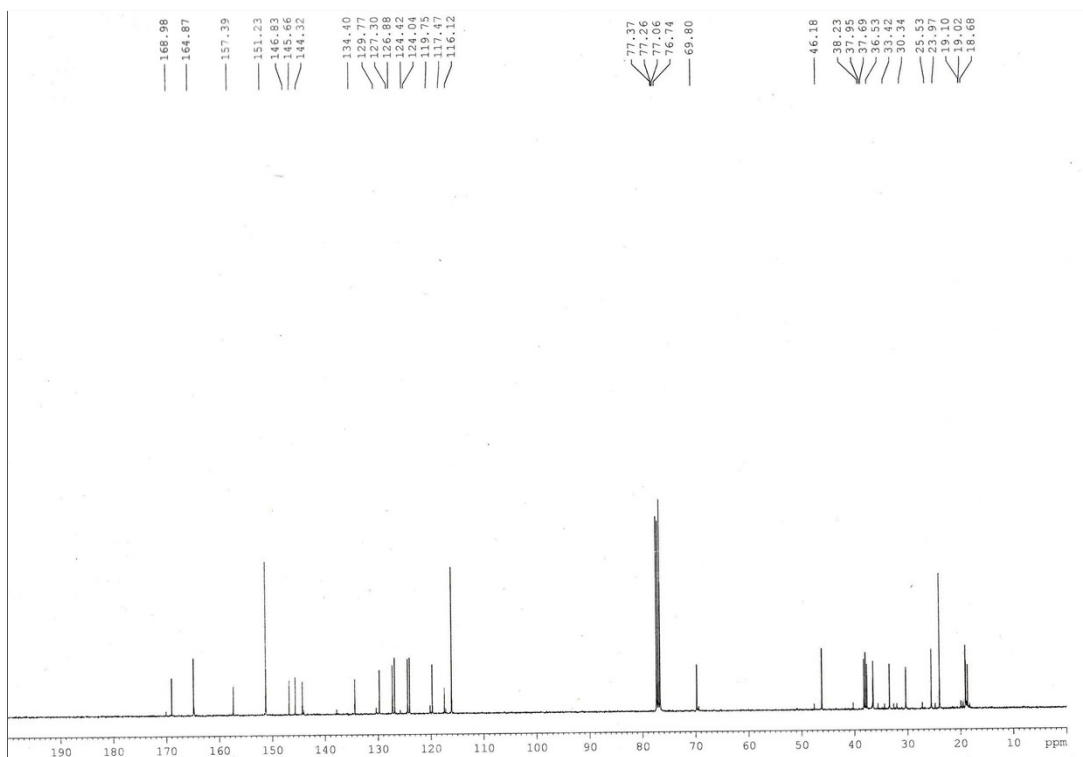

# Mass spectrum of 3

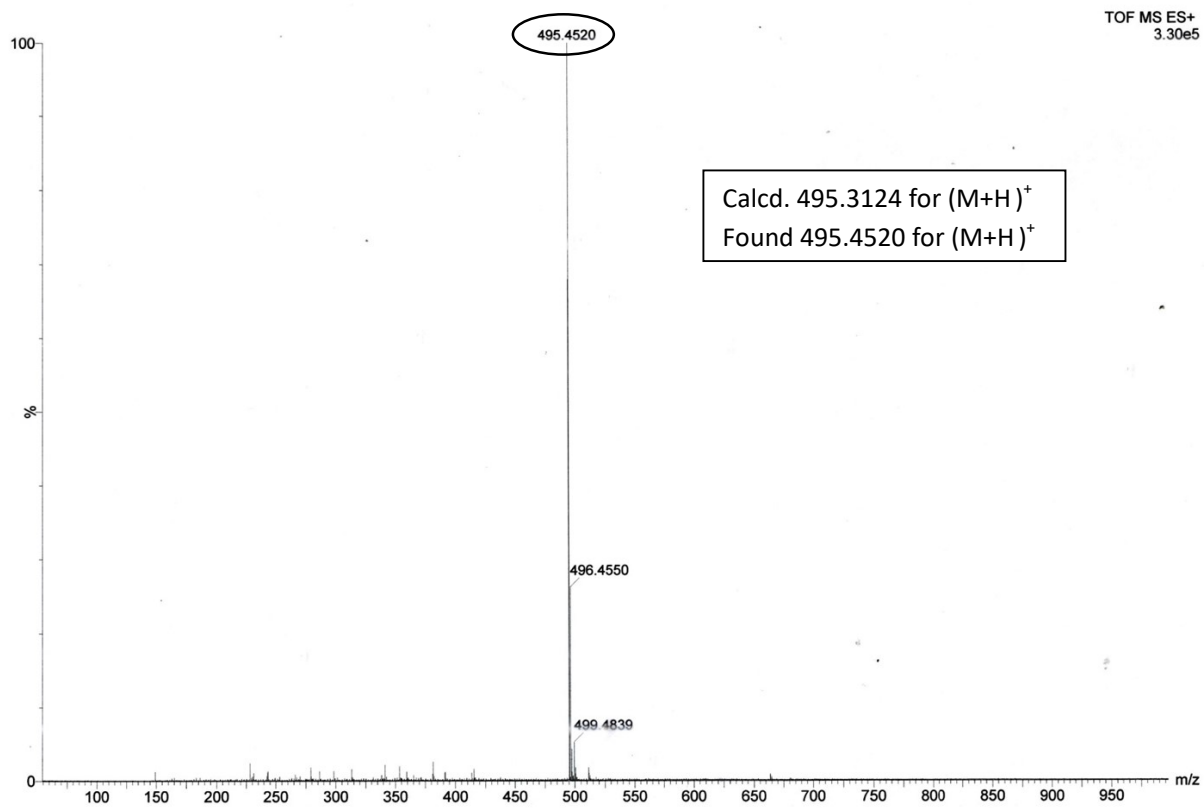

**<sup>1</sup>H NMR (CDCl<sub>3</sub>, 400 MHz) of 4**

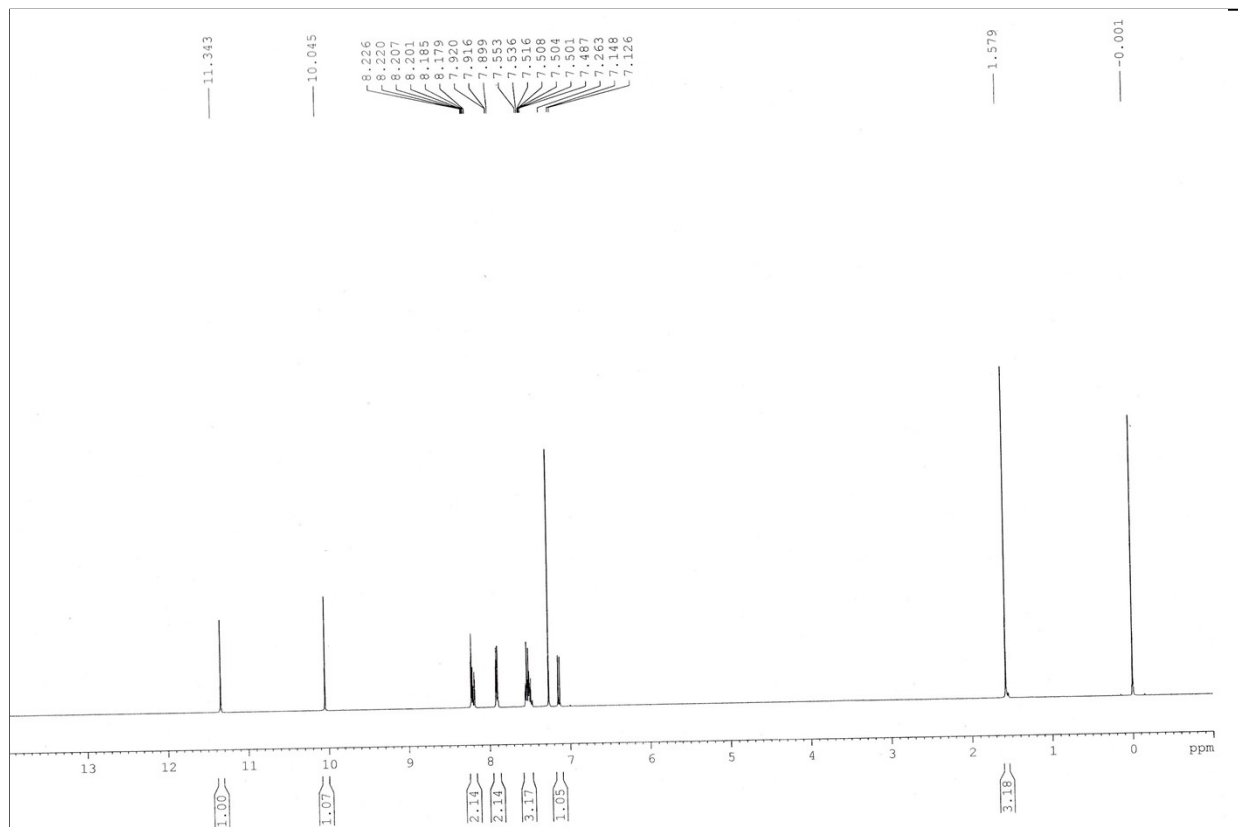



**<sup>1</sup>H NMR (CDCl<sub>3</sub>, 400 MHz) of 6**

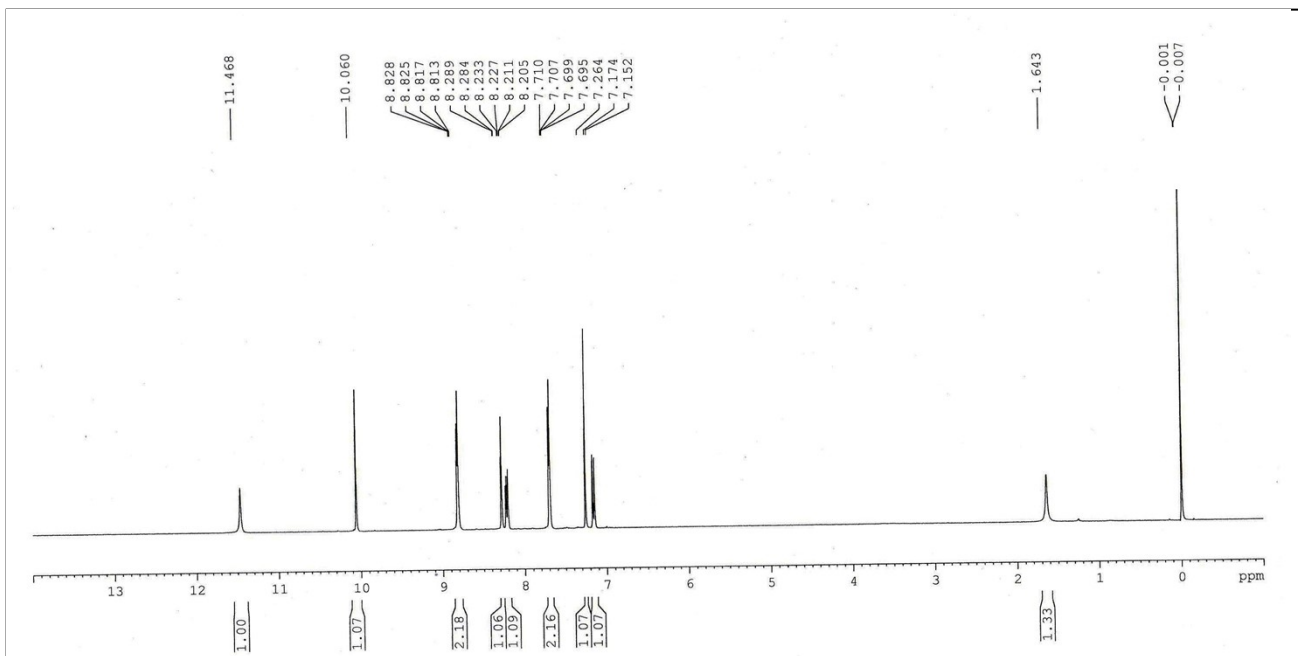

**Reference**

1. S. Ghosh, N. Baildya, N. N. Ghosh and K. Ghosh, *New Journal of Chemistry*, 2021, **45**, 5213-5220.
2. K. Fan, J. Song, J. Li, X. Guan, N. Tao, C. Tong, H. Shen and L. Niu, *Journal of Materials Chemistry C*, 2013, **1**, 7479-7482.
3. A. Panja and K. Ghosh, *Materials Chemistry Frontiers*, 2018, **2**, 1866-1875.
4. W. Chen, W. Gong, J. Ye, Y. Lin and G. Ning, *RSC Advances*, 2012, **2**, 809-811.
5. Y. Wang, J. Xiong, F. Peng, Q. Li and M.-H. Zeng, *Colloids and Surfaces A: Physicochemical and Engineering Aspects*, 2022, **640**, 128445.
6. H. Yin, B. Zhao, W. Kan, T. Liu, W. Wang, G. Yin, L. Wang, Y. Gao and J. Wang, *Spectrochimica Acta Part A: Molecular and Biomolecular Spectroscopy*, 2019, **217**, 18-26.
7. J. Xie, C. Chen, X. Ma and J. Wu, *Inorganic Chemistry Communications*, 2016, **65**, 41-44.
